# Supplementary material for: Early prediction of antigenic transitions for influenza A/H3N2
Source: PubMed Central journal article supplement (PMC7048310; doi:10.1371/journal.pcbi.1007683), 2020-02-18
Supplement: pcbi.1007683.s012.pdf [file pcbi.1007683.s012.pdf]

| Months Ahead | Predictors                                                                                                                                          | AUC  | PPV  | Sensitivity |
|--------------|-----------------------------------------------------------------------------------------------------------------------------------------------------|------|------|-------------|
| 3            | $f_c$<br>$R_c$<br>$\langle R \rangle$<br>$\beta_c / \langle \beta \rangle$<br>$\text{var}(\beta_c) / \text{var}(\beta)$                             | 0.93 | 0.90 | 0.96        |
| 6            | $f_c$<br>$R_j$<br>$\langle R \rangle$<br>$\beta_c / \langle \beta \rangle$<br>$\text{var}(R)$<br>$\text{var}(\beta_c) / \text{var}(\beta)$<br>$I$   | 0.93 | 0.89 | 0.89        |
| 9            | $R_c$<br>$f_c$<br>$\langle R \rangle$<br>$\beta_c / \langle \beta \rangle$<br>$\text{var}(R)$<br>$\text{var}(\beta_c) / \text{var}(\beta)$<br>tMRCA | 0.93 | 0.84 | 0.91        |
| 12           | $R_j$<br>$f_c$<br>$\langle R \rangle$<br>$\text{var}(R)$<br>$\beta_c / \langle \beta \rangle$<br>$\text{var}(\beta_c) / \text{var}(\beta)$          | 0.92 | 0.81 | 0.87        |
