# Supplementary material for: Early prediction of antigenic transitions for influenza A/H3N2
Source: PubMed Central journal article supplement (PMC7048310; doi:10.1371/journal.pcbi.1007683), 2020-02-18
Supplement: pcbi.1007683.s013.pdf [file pcbi.1007683.s013.pdf]

| Months Ahead | Predictors                                                                                                                                 | $R^2$ Adjusted | RMSE (log) |
|--------------|--------------------------------------------------------------------------------------------------------------------------------------------|----------------|------------|
| 3            | $f_c$<br>$R_c$<br>$\langle R \rangle$<br>$\beta_c / \langle \beta \rangle$                                                                 | 0.84           | 0.36       |
| 6            | $f_c$<br>$R_c$<br>$\langle R \rangle$<br>$\beta_c / \langle \beta \rangle$<br>$\text{var}(R)$                                              | 0.74           | 0.51       |
| 9            | $R_c$<br>$f_c$<br>$\langle R \rangle$<br>$\text{var}(R)$<br>$\beta_c / \langle \beta \rangle$<br>$\text{var}(\beta_c) / \text{var}(\beta)$ | 0.66           | 0.65       |
| 12           | $R_j$<br>$f_c$<br>$\langle R \rangle$<br>$\text{var}(R)$<br>$\text{var}(\beta_c) / \text{var}(\beta)$<br>$\beta_c / \langle \beta \rangle$ | 0.57           | 0.77       |
